# Supplementary material for: Time‐course expression QTL‐atlas of the global transcriptional response of wheat to Fusarium graminearum
Source: PubMed Central journal article supplement (PMC5633761; doi:10.1111/pbi.12729), 2017-04-21

Figure S4 Hierarchical clustering of eQTL expression profiles for hotspots 2B at 30 hai (page 2), 2B at 50 hai (page 3), 4A at 30 hai and 50 hai (pages 4 and 5) and 5A at 30 hai and 50 hai (pages 6 and 7). Parental genotypes (A = CM-82036, B = Remus) at the locus are represented in color for each line. The plotted signal intensities have been normalized and transformed prior clustering.

2B 30 hai

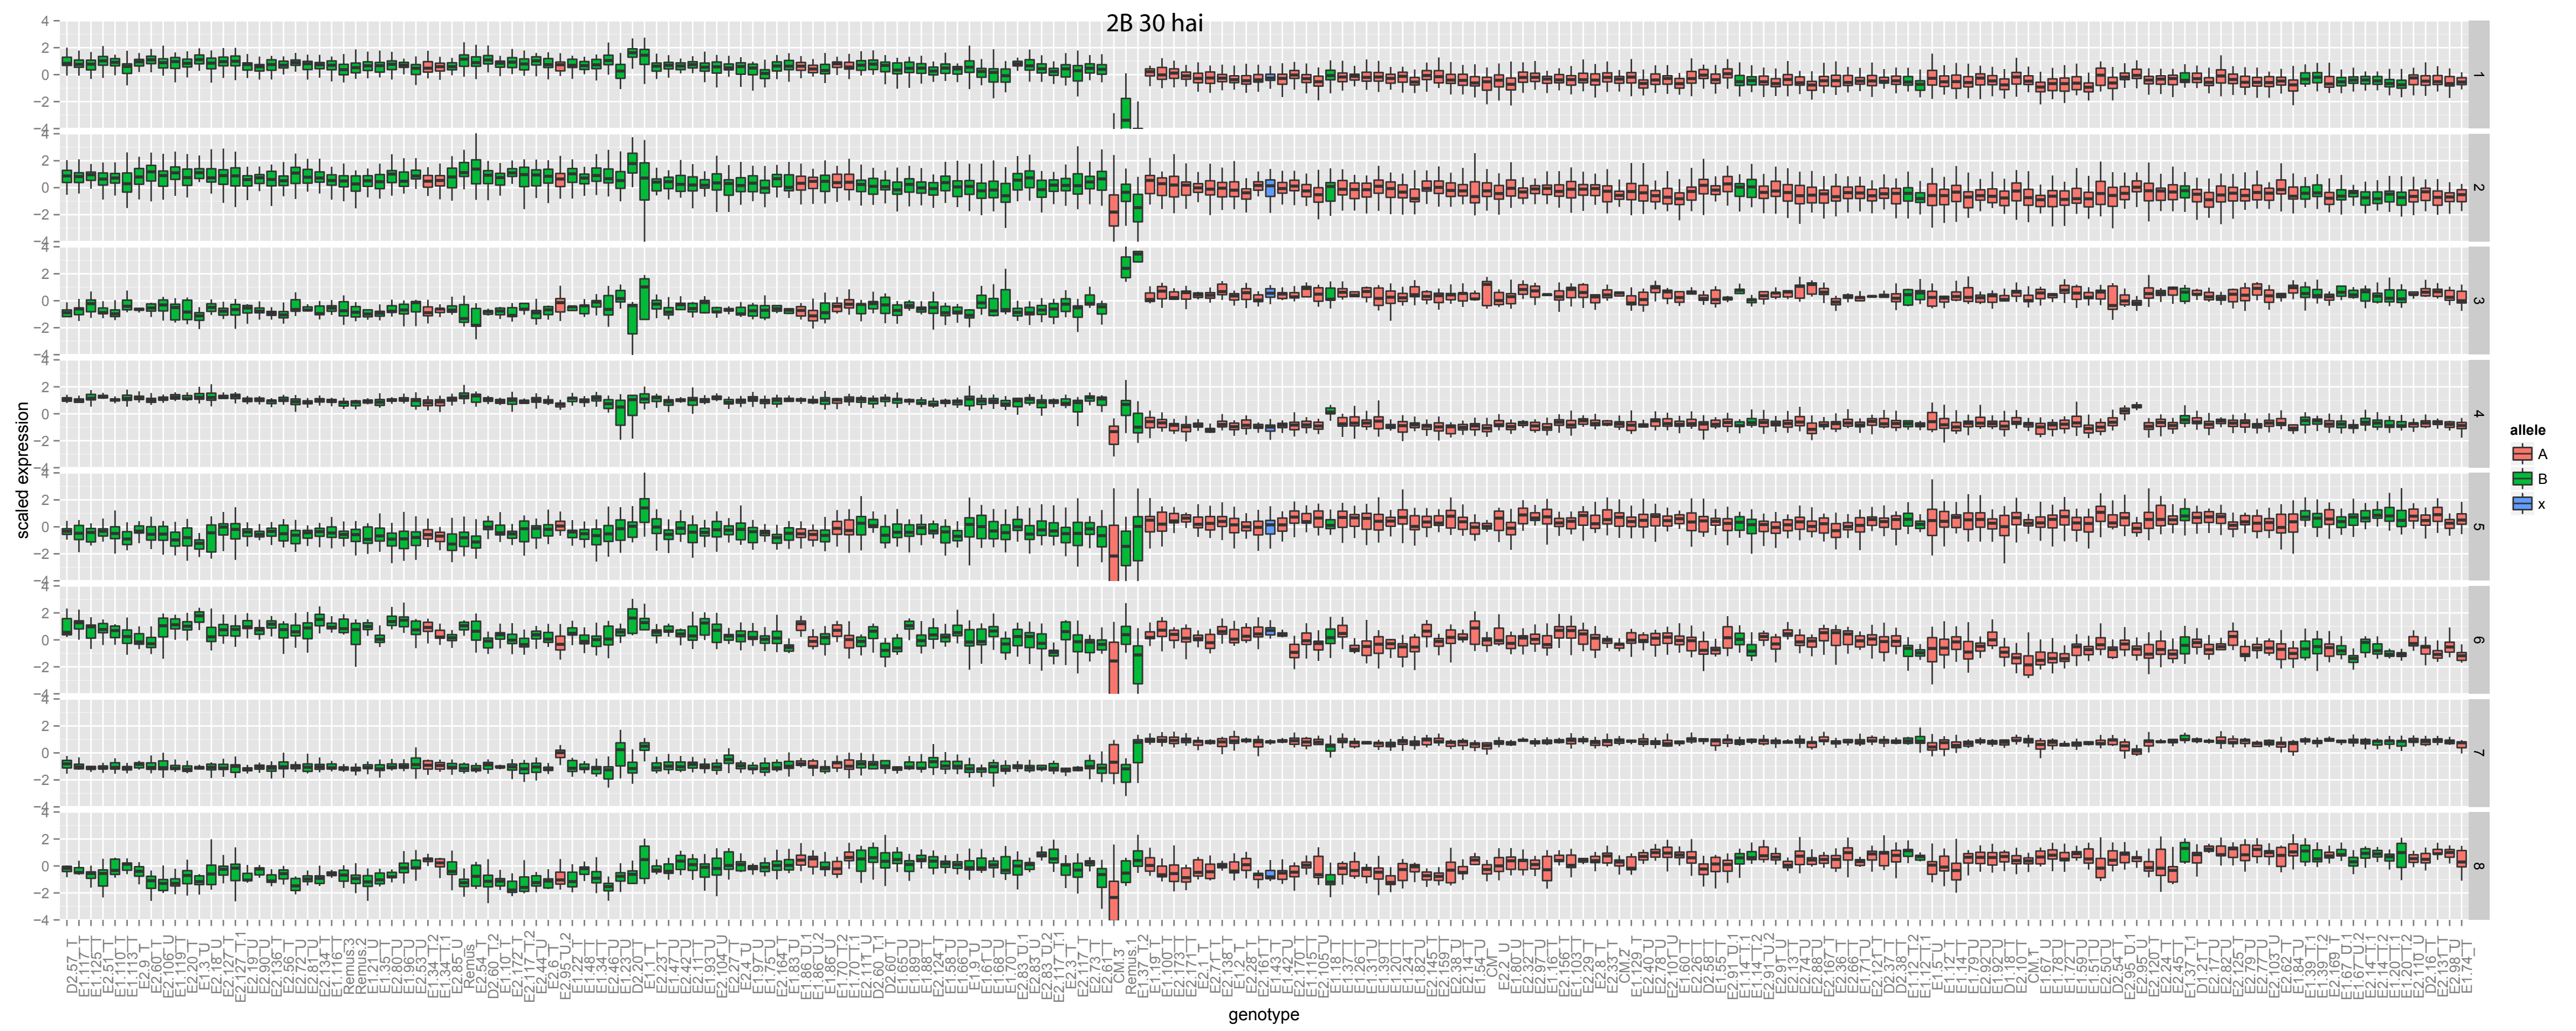

hotspot 2B 50 hai

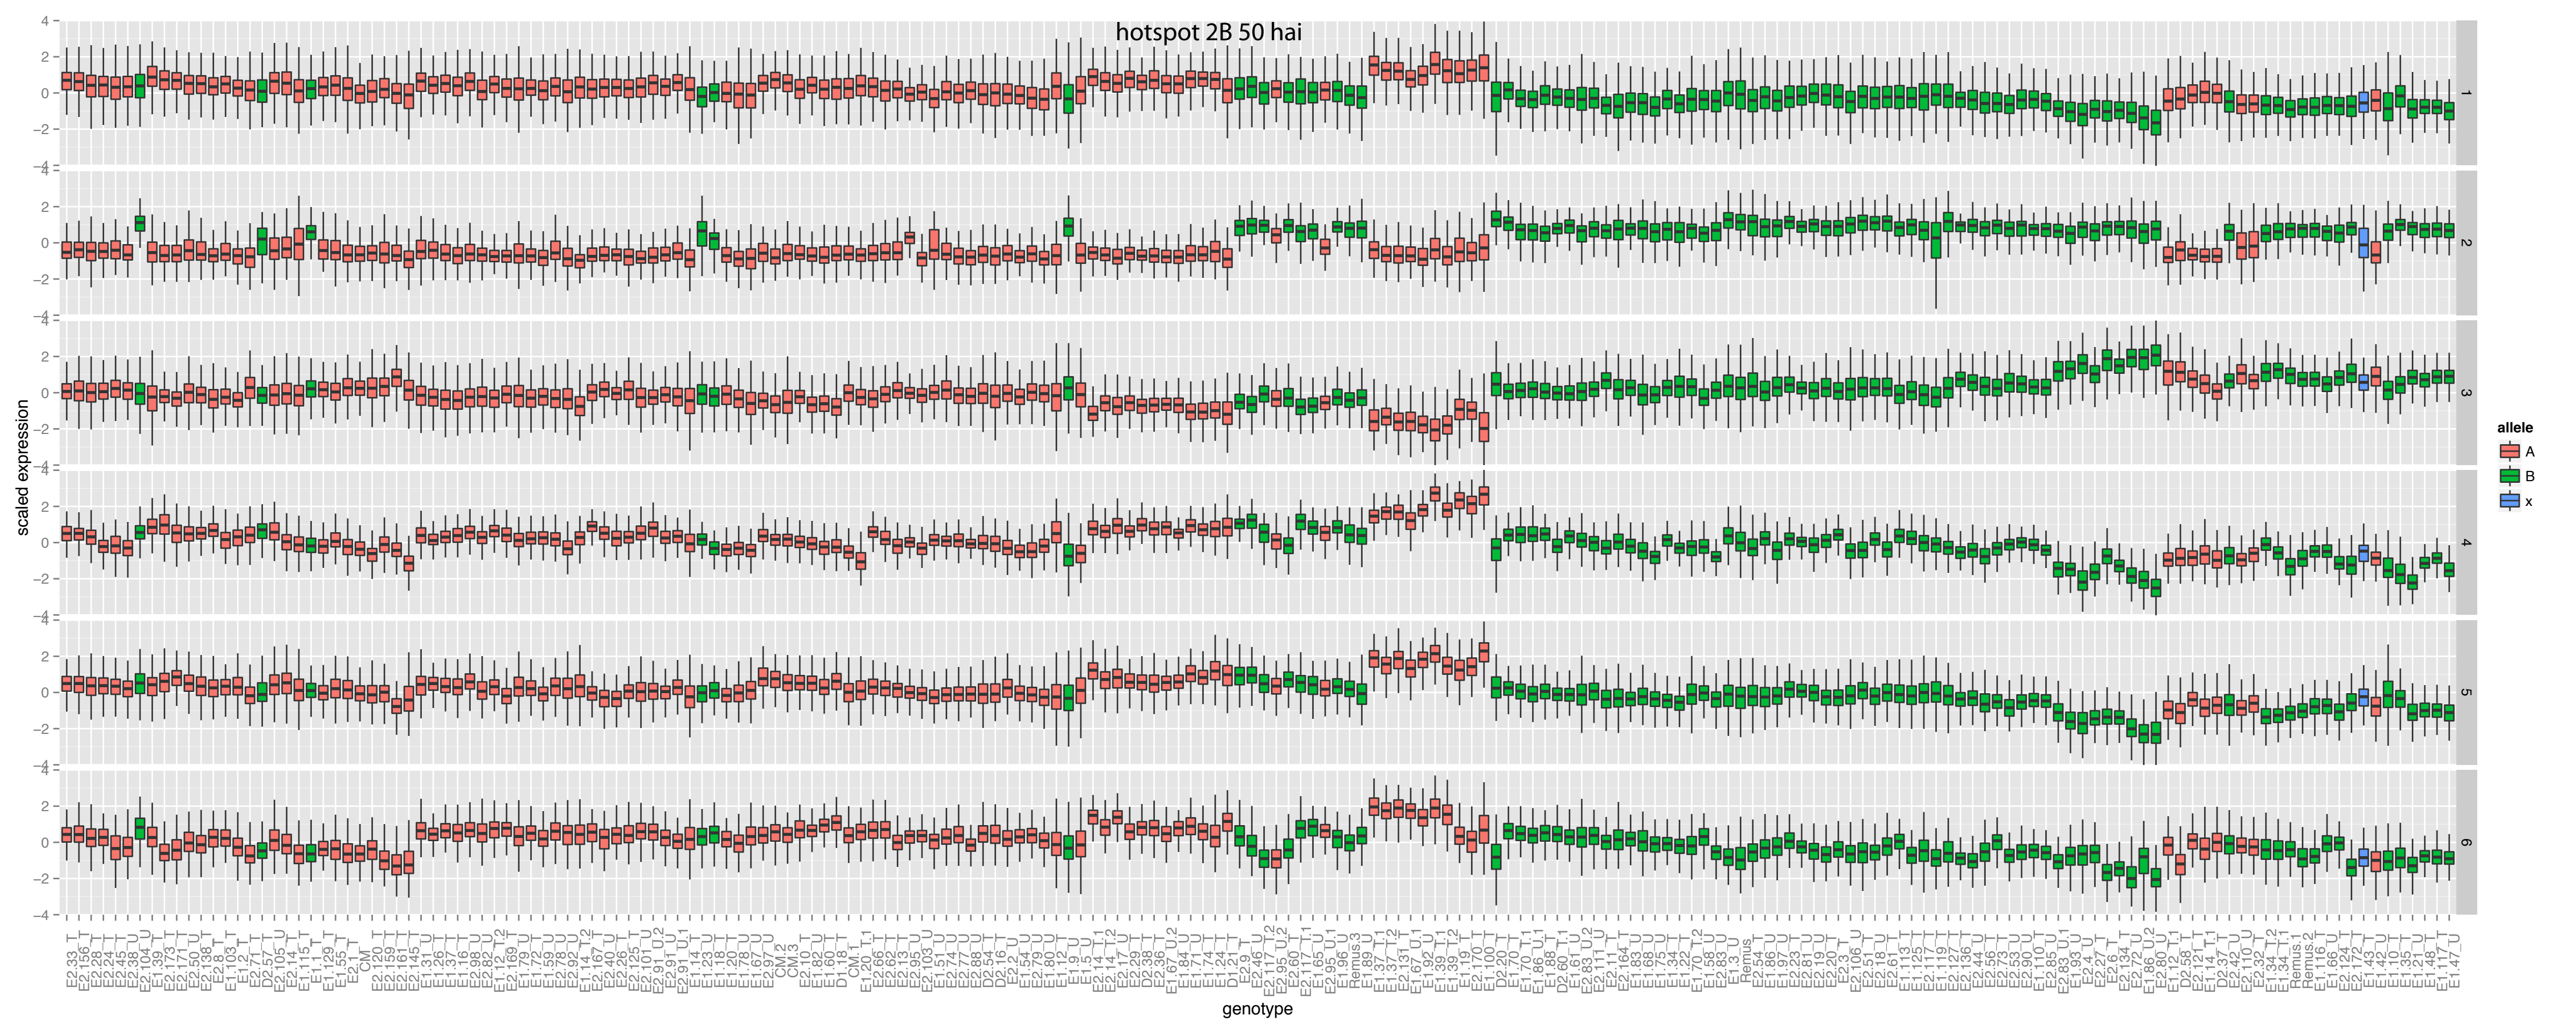

Supplement: PBI-15-1453-s004.pdf [file PBI-15-1453-s004.pdf]
